# Supplementary material
Source: PubMed Central journal article supplement (PMC7906676)
Supplement: mmc1.pdf [file mmc1.pdf]

# THE LANCET

## Infectious Diseases

### Supplementary appendix

This appendix formed part of the original submission and has been peer reviewed.  
We post it as supplied by the authors.

Supplement to: Inzaule SC, Tessema SK, Kebede Y, Ouma AEO, Nkengasong JN.  
Genomic-informed pathogen surveillance in Africa: opportunities and challenges.  
*Lancet Infect Dis* 2021; published online Feb 12. [https://doi.org/10.1016/S1473-3099\(20\)30939-7](https://doi.org/10.1016/S1473-3099(20)30939-7).

## APPENDIX

**Table S1: Current institutions with next-generation sequencing capacity in Africa**

| Country                          | Institution                                                                                              |
|----------------------------------|----------------------------------------------------------------------------------------------------------|
| Algeria                          | Centre Pierre et Marie Curie Alger, Algiers                                                              |
|                                  | Hi-tech detection systems Algeria, Algiers                                                               |
|                                  | Université des Sciences et de la Technologie d'Oran Mohamed-Boudiaf, Algiers                             |
| Benin                            | Centre National Hospitalier de Pneumo-Phtisiologie, Cotonou                                              |
| Botswana                         | Botswana International University of Science and Technology, Palapye                                     |
|                                  | Botswana Institute for Technology Research and Innovation, Gaborone                                      |
| Cameroon                         | Centre Pasteur of Cameroon, Yaounde                                                                      |
| Democratic Republic of the Congo | National institute for Biomedical Research, Kinshasa                                                     |
| Egypt                            | National Research Centre, Cairo                                                                          |
|                                  | Biomedical Genomics Center of Excellence, Cairo                                                          |
|                                  | Faculty of Medicine Ain Shams University Research Institute, Cairo                                       |
|                                  | Faculty of Medicine, Cairo University and The Center for Genome and Microbiome Research, Cairo           |
|                                  | The Central Laboratory for veterinary quality control on poultry products, Giza                          |
| Ethiopia                         | Addis Ababa Science and Technology University, Addis Ababa                                               |
|                                  | Armaeur Hansen Research Institute, Addis Ababa                                                           |
|                                  | Central Public Health Laboratories, Cairo                                                                |
|                                  | Ethiopia Public Health Institute, Addis Ababa                                                            |
|                                  | National Animal Health Diagnosis and Investigation Center, Sebeta                                        |
|                                  | Emergence des Maladies Virales, Centre International de Recherches Medicales de Franceville, Franceville |
| Gabon                            | Medical Research Centre, Serrekunda                                                                      |
| The Gambia                       | Ruma Fertility and Specialist Hospital, Kumasi                                                           |
| Ghana                            | University of Ghana, Accra                                                                               |
|                                  |                                                                                                          |
| Kenya                            | Foot-and-Mouth Disease Laboratory, Nairobi                                                               |
|                                  | International Livestock Research Institute, Nairobi                                                      |
|                                  | Jomo Kenyatta University of Agriculture and Technology, Nairobi                                          |
|                                  | Kenya Medical Research Institute, Centre for Viral Research, Nairobi                                     |
|                                  | Kenya Medical Research Institute, Centre for Global Health Research, Kisumu                              |
|                                  | Kenya Medical Research Institute, Wellcome Trust Research Programme, Kilifi                              |
|                                  | Kenya Agricultural and Livestock Research Organization, Nairobi                                          |
|                                  | National HIV reference laboratory, Nairobi                                                               |
|                                  | US Army Medical Research Unit, Kisumu                                                                    |
|                                  | The Africa Genomics Centre and Consultancy Ltd, Nairobi                                                  |
|                                  | The Nairobi In vitro fertilization centre Ltd, Nairobi                                                   |
|                                  | World Agroforestry Centre, Nairobi                                                                       |
| Madagascar                       | Institut Pasteur de Madagascar, Antananarivo                                                             |
| Mali                             | University of Bamako, Bamako                                                                             |
| Morocco                          | Casablanca Hassan II University, Casablanca                                                              |
|                                  | Centre hospitalo-universitaire Mohammed vi Marrakech, Marrakesh                                          |
|                                  | Centre National de la Recherche Scientifique et Technique, Rabat                                         |
|                                  | Institut National d'Hygiene, Casablanca                                                                  |
|                                  | Institut National de la Recherche Agronomique, Rabat                                                     |
|                                  | Institut Pasteur du Maroc, Casablanca                                                                    |
|                                  | Laboratoire de Recherche et d'Analyses Medicales, Rabat                                                  |
|                                  | Laboratoire Anoual de, Casablanca                                                                        |
|                                  | Mohammed VI Polytechnic University, Ben Guerir                                                           |
|                                  | Sciences et Technologies de la Santé, Casablanca                                                         |
| Nigeria                          | Bioresources development centre, Odi                                                                     |
|                                  | Nigeria Centre for Disease Control, Abuja                                                                |
|                                  | Nisa Premier Hospital, Abuja                                                                             |
|                                  | Mainland Hospital, Lagos                                                                                 |
|                                  | Redeemer's University, Ede                                                                               |
|                                  | University of Ibadan, Ibadan                                                                             |
| Rwanda                           | Rwanda National Reference Laboratory , Kigali                                                            |
| Senegal                          | Institut De Recherche En Santé De Surveillance Épidémiologique Et De Formation, Dakar                    |
|                                  | Institut Pasteur Dakar, Dakar                                                                            |
| Sierra Leone                     | Kenema Government Hospital, Kenema                                                                       |

|                                               |                                                                   |
|-----------------------------------------------|-------------------------------------------------------------------|
| South Africa                                  | Africa health research institute, Durban                          |
|                                               | Ampath laboratories, Pretoria                                     |
|                                               | Centre for Assisted Reproduction & Endocrinology, Durban          |
|                                               | Center for Proteomic and Genomic, Cape town                       |
|                                               | Council for Scientific and Industrial Research, Pretoria          |
|                                               | Dietrich, Voigt, Mia & Partners, Cape town                        |
|                                               | Drs Gritzman & Thatcher Inc. Laboratories, Johannesburg           |
|                                               | Kwazulu-Natal Research Innovation and Sequencing Platform, Durban |
|                                               | Lancet Laboratories Pty Ltd                                       |
|                                               | Molecular diagnostic services, Durban                             |
|                                               | National Health Laboratory Service, Johannesburg                  |
|                                               | National Institute for Communicable Diseases, Johannesburg        |
|                                               | North-West University, Potchefstroom                              |
|                                               | Oncolab diagnostics, Pretoria                                     |
|                                               | Protechnik laboratories, Pretoria                                 |
|                                               | South Africa National Biodiversity institute, Pretoria            |
|                                               | Stellenbosch University, Stellenbosch                             |
|                                               | TOKA BIO, Pretoria                                                |
|                                               | Unistel Medical Laboratories, Cape town                           |
|                                               | University of Cape town, Cape town                                |
| University of KwaZulu-Natal, Durban           |                                                                   |
| University of Pretoria, Pretoria              |                                                                   |
| University of the Witwatersrand, Johannesburg |                                                                   |
| Sudan                                         | National Public Health Laboratory, Khartoum                       |
| Tanzania                                      | Sokoine University of Agriculture, Morogoro                       |
|                                               | Kilimanjaro Christian Medical University, Moshi                   |
|                                               | Government Chemist Laboratory Authority, Dar es Salaam            |
| Tunisia                                       | National Influenza and other Respiratory Viruses Centre           |
| Uganda                                        | Fred Hutchinson Centre Research Institute, Kampala                |
|                                               | Makerere University, Kampala                                      |
|                                               | National TB Reference Laboratory                                  |
|                                               | Uganda Virus Research Institute, Entebbe                          |
| Zambia                                        | Hokudai Center for Zoonosis Control in Zambia, Lusaka             |
|                                               | National Public Health Institute, Lusaka                          |
|                                               | Program for Appropriate Technology in Health, Lusaka              |
| Zimbabwe                                      | Ruedi Luethy Foundation, Harare                                   |

The data were primarily obtained from the three major sequencing companies: Illumina, Oxford Nanopore, and Ion Torrent, but this might still not fully represent all institutions that have sequencing capacity in the continent as some equipment may have been donated.
